# Supplementary material for: Unattached kinetochores drive their own capturing by sequestering a CLASP
Source: PubMed Central journal article supplement (PMC5830412; doi:10.1038/s41467-018-03108-z), 2018-02-28
Supplement: 41467_2018_3108_MOESM1_ESM.pdf [file 41467_2018_3108_MOESM1_ESM.pdf]

## Supplementary information

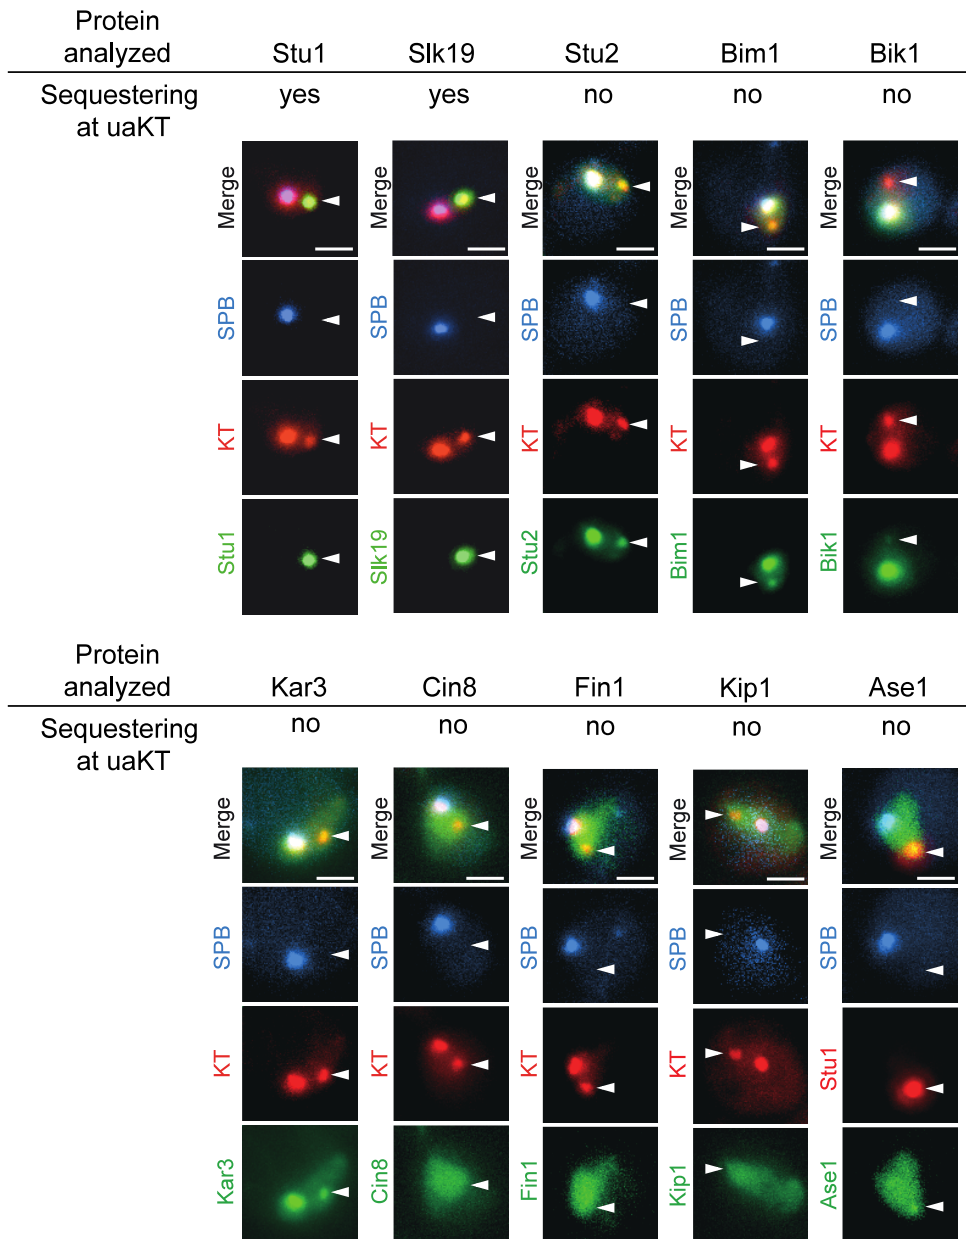

**Supplementary Figure 1** In contrast to Stu1 and Slk19, the microtubule-associated proteins Stu2, Bim1, Bik1, Kar3, Cin8, Fin1, Kip1 and Ase1 are not sequestered at uaKTs. Genotypes of the used strains are listed in Supplementary Table 1. Bars, 2 $\mu$ m. White arrowheads mark uaKTs. Cells were analyzed 3-4 h after the release from G1 into nocodazole. The Stu1 and Slk19 phenotypes are as shown in Figure 1 and have been included for comparison. The other phenotypes shown are representative for the indicated proteins. Most notably, no sequestering was observed in n>100 cells in these cases.

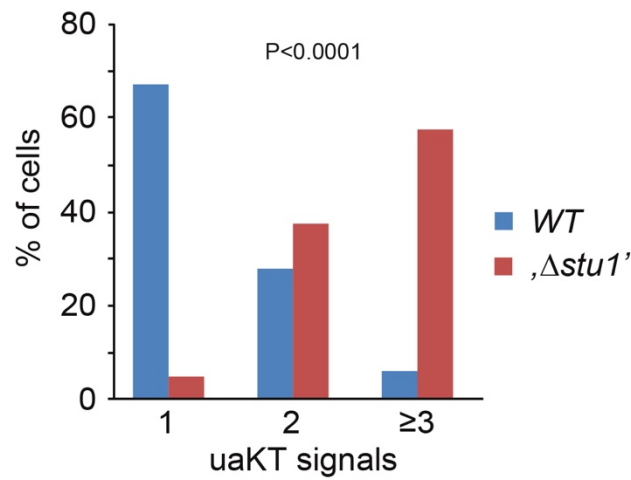

**Supplementary Figure 2** Sequestering of Stu1 supports the clustering of uaKTs. Genotypes of the used strains are listed in Supplementary Table 1. Statistics see Supplementary Table 3. Cells with the indicated genetic background were analyzed 3-4 h after the release from G1 into nocodazole (see Fig. 1b and d for phenotypes). Only cells that revealed at least one uaKT cluster were included in the analysis.  $\Delta stu1$  indicates that Stu1 was depleted.

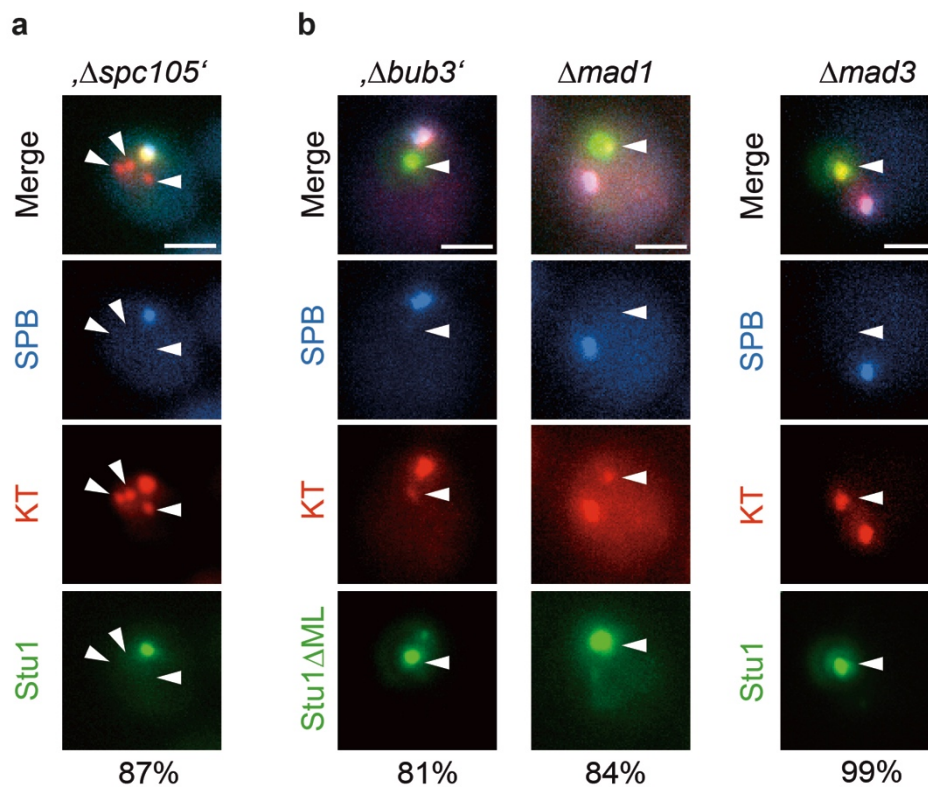

**Supplementary Figure 3** Sequestering and localization of Stu1 at uaKTs depends on Spc105 but not on Bub3, Mad1 and Mad3. **(a-b)** Genotypes of the used strains are listed in Supplementary Table 1. SAC-deficient cells can progress into anaphase despite nocodazole treatment. This might affect the results (for instance due to Mps1 inactivation). Therefore, cells with the indicated genetic background were released from G1 into nocodazole while inducing metaphase arrest by Cdc20 depletion. ' $\Delta spc105$ ' and ' $bub3$ ' indicates that the proteins were depleted after the metaphase arrest. The percentage of cells that revealed the depicted phenotype is indicated. White arrowheads indicate uaKTs. Bars, 2 $\mu$ m. Statistics see Supplementary Table 3. **(a)** Spc105 is essential for Stu1 localization and sequestering at uaKTs. **(b)** Bub3, Mad1 and Mad3 are not essential for Stu1 $\Delta$ ML or Stu1 sequestering. Stu1 in the background was depleted.

anti-Flag IP

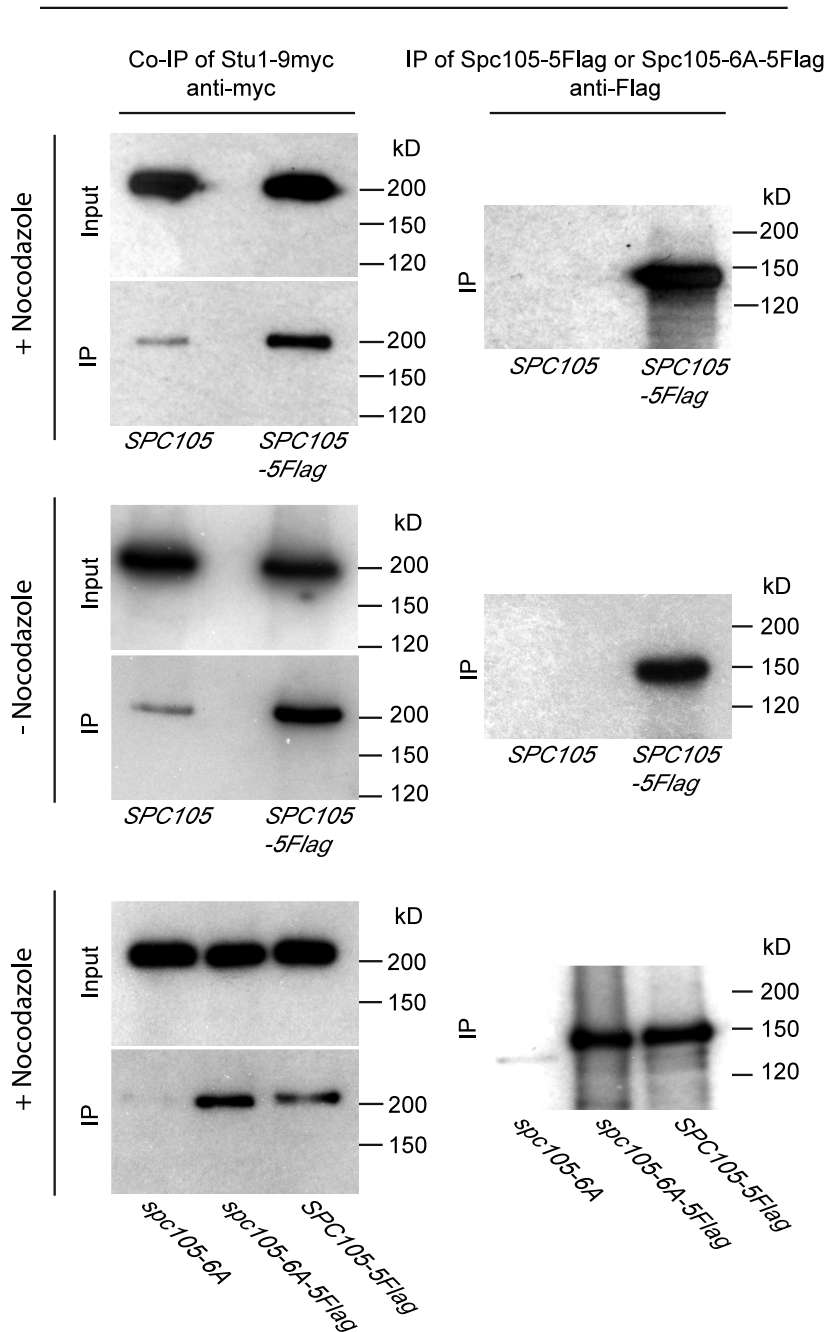

**Supplementary Figure 4** Stu1 co-purifies with Spc105 or Spc105-6A in nocodazole-arrested cells and Spc105 in cycling cells. Genotypes of the used strains are listed in Supplementary Table 1. Stu1-9myc and Spc105-5Flag or Spc105-6A-5Flag were coexpressed under endogenous promoters in *S. cerevisiae* and Spc105-5Flag or Spc105-6A-5Flag was affinity purified. Wild type Spc105 in the background of *spc105-6A* cells was depleted. Note that Stu1 resides exclusively at uaKTs in nocodazole-treated *SPC105* WT cells (Fig. 1b) but predominantly at attached KTts in nocodazole-treated *spc105-6A* cells (Fig. 1l) or untreated *SPC105* wildtype cells.

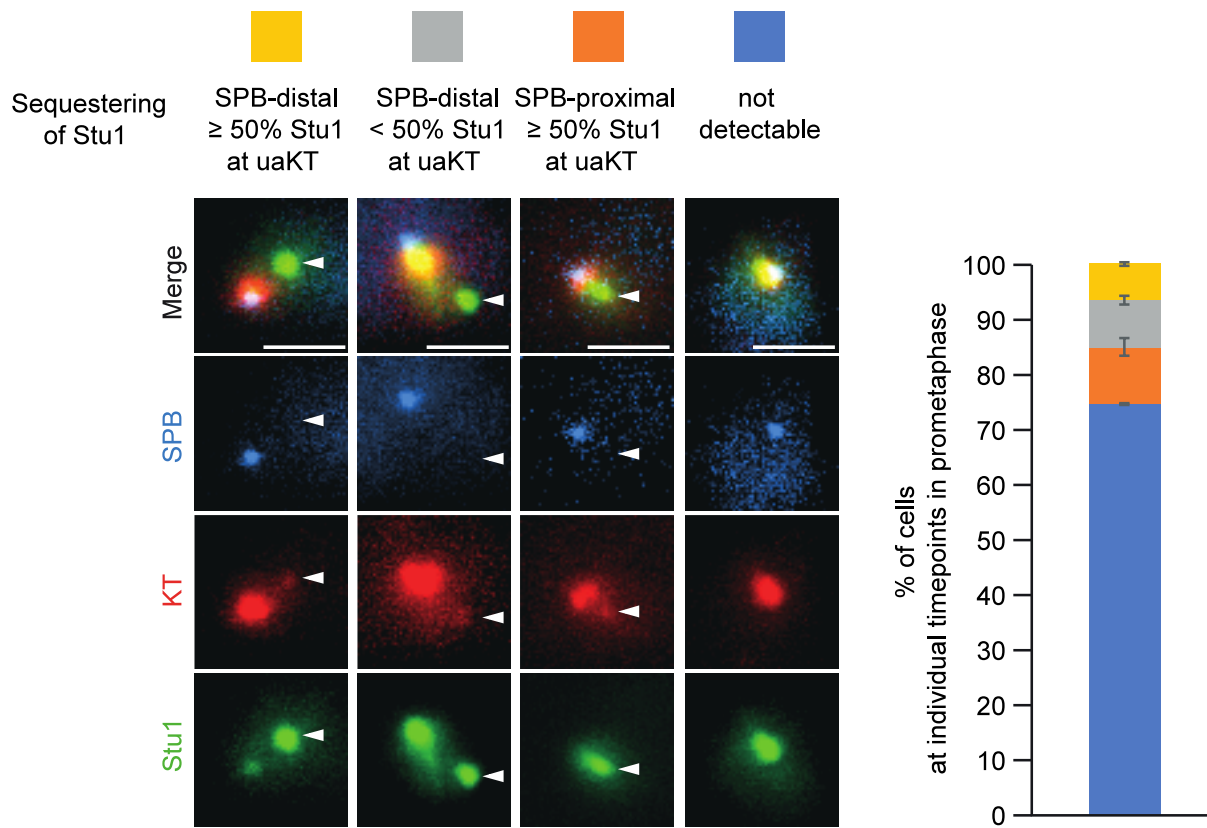

**Supplementary Figure 5** Cells in prometaphase exhibit uaKTs that sequester Stu1. The genotype of the used strain is listed in Supplementary Table 1. Bars, 2 $\mu$ m. Cells were analyzed at individual timepoints 45-67min after the release from G1. Only cells with a small bud (diameter  $\leq 1.6\mu$ m) were counted. Error bars represent the standard deviation of three independent experiments. White arrowheads mark uaKTs. Statistics see Supplementary Table 3.

Prometaphase: Stu1 / Slk19 are sequestered at uaKTs

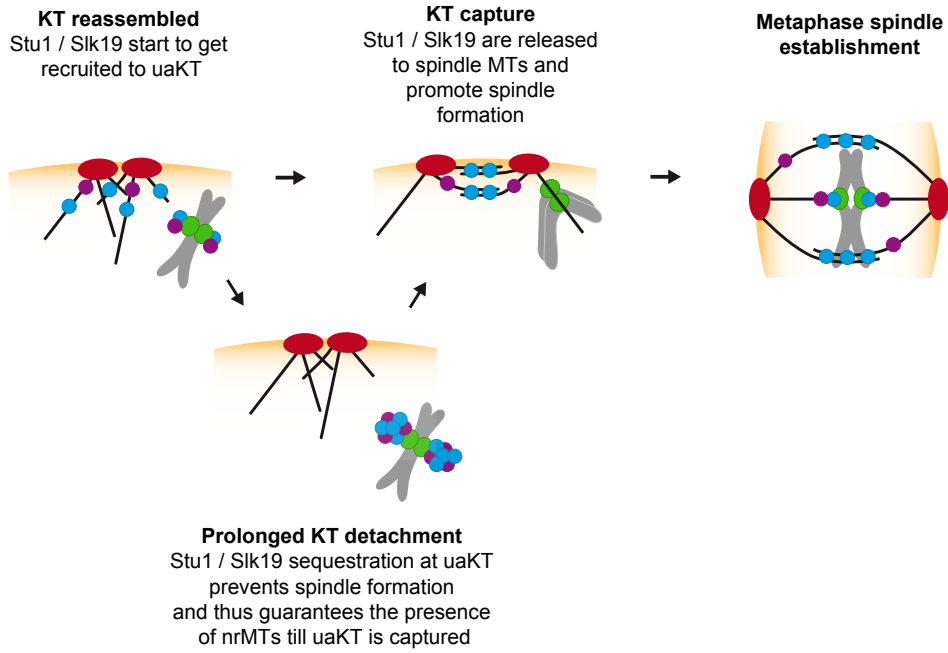

Prometaphase: Stu1 / Slk19 are **NOT** sequestered at uaKTs

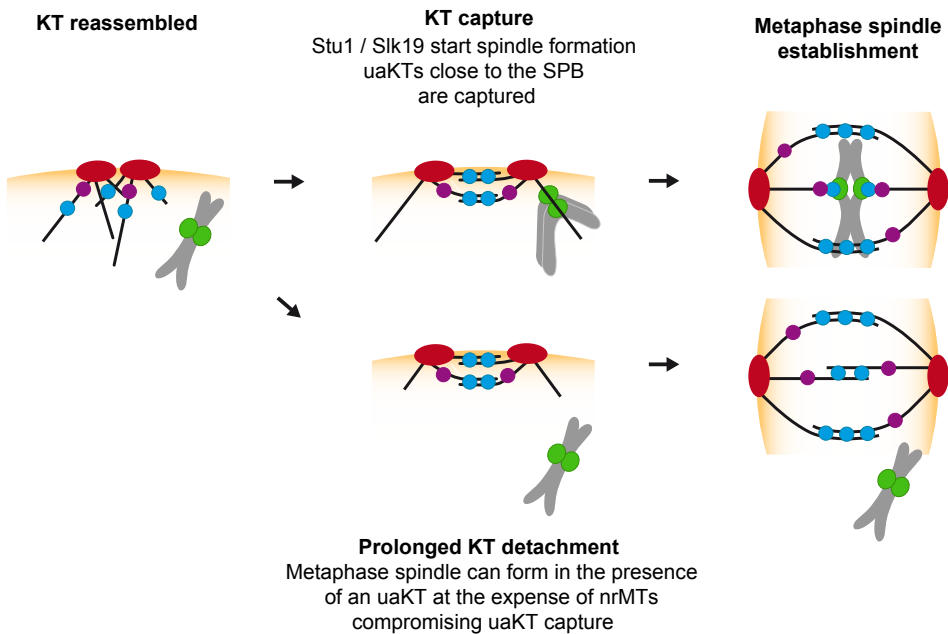

nuclear membrane  
  MT  
  mature SPB  
  KT  
  Stu1  
  Slk19

**Supplementary Figure 6** Model depicting the putative role of Stu1 / Slk19 sequestering at uaKTs in prometaphase. Sequestering of Stu1 / Slk19 at prevailing uaKTs prevents spindle formation and thus guarantees the availability of capturing MTs till uaKTs are captured (above). If Stu1 / Slk19 would not be sequestered at prevailing uaKTs, spindle formation would occur in the presence of uaKTs. This would decrease the number and length of capturing MTs and thus compromise the capturing of these uaKTs (below).

**Supplementary Table 1** Yeast strains used in this study

| Strain name | Relevant Genotype                                                                                                                                                                                                                                                                                                             | Figure                 |
|-------------|-------------------------------------------------------------------------------------------------------------------------------------------------------------------------------------------------------------------------------------------------------------------------------------------------------------------------------|------------------------|
| YJO1117     | <i>MATa Δsst1 ade2-101ochre trp1-Δ63 leu2-Δ1 ura3-52 his3-Δ200 lys2-801ambre AME1-GFP::kanMX6 STU1-ECFP::HIS3MX6 SPC72-3mCherry::hphNT1</i>                                                                                                                                                                                   | 1b, Supplement 1 and 2 |
| YJO1422     | <i>MATa Δsst1 ade2-101ochre trp1-Δ63 leu2-Δ1 ura3-52 his3-Δ200 lys2-801ambre AME1-GFP::kanMX6 SPC72-3mCherry::hphNT1 SLK19-ECFP::HIS3MX6</i>                                                                                                                                                                                  | 1c, Supplement 1       |
| YJO2718     | <i>MATa Δsst1 ade2-101 ochre::pADH1-OsTIR1-9Myc::ADE2 trp1-Δ63 leu2-Δ1 ura3-52 his3-Δ200 lys2-801ambre NUF2-3mCherry::natNT2 SPC72-ECFP::hphNT1 SLK19-yeGFP::HIS3MX6 STU1-IAA17::kanMX4</i>                                                                                                                                   | 1d, Supplement 2       |
| YJO2654     | <i>MATa Δsst1 ade2-101 ochre trp1-Δ63 leu2-Δ1 ura3-52 his3-Δ200 lys2-801 ambre SPC72-ECFP::kanMX4 MTW1-3mCherry::hphNT1 STU1-yeGFP::kiTRP1 Δslk19::HIS3MX6</i>                                                                                                                                                                | 1e                     |
| YVS1651     | <i>MATa Δsst1 ade2-101 ochre trp1-Δ63 leu2-Δ1 ura3-52 his3-Δ200 lys2-801 ambre::CFP-TUB1::LYS2 AME1-1mCherry::hphNT1 stu1Δ(aa995-1180)-EGFP::kiTRP1</i>                                                                                                                                                                       | 1f                     |
| YVS2151     | <i>MATa Δsst1 ade2-101 ochre trp1-Δ63 leu2-Δ1 ura3-52 his3-Δ200 lys2-801 ambre SPC72-3mCherry::hphNT1 SLK19-EGFP::kiTRP1 stu1Δ(aa995-1180)-CFP::kanMX6</i>                                                                                                                                                                    | 1g                     |
| YJO2717     | <i>MATa Δsst1 ade2-101 ochre::pADH1-OsTIR1-9Myc::ADE2 trp1-Δ63 leu2-Δ1 ura3-52 his3-Δ200 lys2-801 ambre::pSTU1-FLAG-stu1Δ(aa1-260, 1182-1514)-NLS-GFP::LYS2 NUF2-3mCherry::natNT2 SPC72-ECFP::hphNT1 STU1-IAA17::kanMX4</i>                                                                                                   | 1h                     |
| YJO2716     | <i>MATa Δsst1 ade2-101 ochre::pADH1-OsTIR1-9Myc::ADE2 trp1-Δ63 leu2-Δ1 ura3-52 his3-Δ200 lys2-801 ambre::pSTU1-FLAG-stu1Δ(aa1-260, 997-1514)-NLS-GFP::LYS2 NUF2-3mCherry::natNT2 SPC72-ECFP::hphNT1 STU1-IAA17::kanMX4</i>                                                                                                    | 1i                     |
| YJO2471     | <i>MATa Δsst1 ade2-101 ochre trp1-Δ63::mps1-as1(M516G)-6HA::kiTRP1 leu2-Δ1 ura3-52 his3-Δ200 lys2-801 ambre MTW1-CFP::hphNT1 STU1-3mCherry::natNT2 SPC72-EGFP::kanMX4 Δmps1::HIS3MX6</i>                                                                                                                                      | 1j                     |
| YJO2745     | <i>MATa Δsst1 ade2-101 ochre trp1-Δ63::mps1-as1(M516G)-6HA::kiTRP1 leu2-Δ1 ura3-52 his3-Δ200 lys2-801 ambre MTW1-CFP::hphNT1 STU1-3mCherry::natNT2 SLK19-yeGFP::kanMX6 Δmps1::HIS3MX6</i>                                                                                                                                     | 1k                     |
| YJO2740     | <i>MATa Δsst1 ade2-101 ochre::pADH1-OsTIR1-9Myc::ADE2 trp1-Δ63 leu2-Δ1::spc106-6A (T149A, T172A, T211A, T235A, T284A, T313A)::LEU2 ura3-52 his3-Δ200 lys2-801 ambre NUF2-3mCherry::natNT2 SPC72-yeCFP::hphNT1 STU1-yeGFP::kiTRP1 SPC105-IAA17-3HA::HIS3MX6 cdc20::kanMX6-pGAL1-3HA-CDC20</i>                                  | 1l                     |
| YJO2818     | <i>Mata Δsst1 ade2-101ochre::P<sub>ADH1</sub>-OsTIR1-9Myc::ADE2 trp1-Δ63 leu2-Δ1 ura3-52 his3-Δ200 lys2-801ambre::pStu1-FLAG-stu1Δ(aa570-716)-NLS-GFP::LYS2 MTW1-3mcherry::natNT2 SPC72-eCFP::hphNT1 STU1-IAA17::kiURA3 SPC105-2xFKBP12 NDC80-3HA-kiTRP1 MPS1-FRB::HIS3MX6 Δfpr1::LEU2 tor1-1 cdc20:KANMX6-pGAL1-3HA-CDC2</i> | 1m                     |
| YCF2671     | <i>MATa Δsst1 ade2-101 ochre trp1-Δ63 leu2-Δ1 ura3-52::GFP-TUB1::URA3kl his3-Δ200 lys2-801 ambre STU1-3mCherry::natNT2 Δcen5::pGAL1-CEN3-LEU2 ADE1-pURA3-tetR-Cerulean5x::hphNT1 CEN5-tetO2x112-tetOx112::HIS3 cdc20::kiTRP1-pMET25-CDC20</i>                                                                                 | 2a, 6a, 7c, 8a-j       |
| YME2710     | <i>MATa Δsst1 ade2-101ochre::pADH1-OsTIR1-9Myc::ADE2 trp1-Δ63 leu2-Δ1 ura3-52::GFP-TUB1::URA3kl his3-Δ200 lys2-801 ambre::pSTU1-stu1Δ(aa995-1180)-1mCherry::LYS2 STU1-IAA17::KANMX4 Δcen5::pGAL1-CEN3-LEU2 ADE1-pURA3-tetR-Cerulean5x::hphNT1 CEN5-tetO2x112-tetOx112::HIS3 cdc20::kiTRP1-pMET25-CDC20</i>                    | 2b, 6a                 |
| YCF2673     | <i>MATa Δsst1 ade2-101 ochre trp1-Δ63 leu2-Δ1 ura3-52::GFP-TUB1::URA3kl his3-Δ200 lys2-801 ambre STU1-3mCherry::natNT2 Δcen5::pGAL1-CEN3-LEU2 ADE1-pURA3-tetR-Cerulean5x::hphNT1 CEN5-tetO2x112-tetOx112::HIS3 cdc20::kiTRP1-pMET25-CDC20 Δslk19::KANMX6</i>                                                                  | 2c, 6a, 8a-j           |
| YME2902     | <i>MATa Δsst1 ade2-101ochre::pADH1-OsTIR1-9Myc::ADE2 trp1-Δ63 leu2-Δ1 ura3-52 his3-Δ200 lys2-801ambre STU1-3mCherry::natNT2 DAD1-yeGFP::kiTRP1 Δcen5::pGAL1-CEN3-LEU2 ADE1-pURA3-tetR-CFP3x::hphNT1 CEN5-tetO2x112::HIS3 cdc20::URA3kl-pMET25-CDC20 MPS1-IAA17-3HA-kanMX4</i>                                                 | 2d, 4a-e, 6a           |
| YCF2475     | <i>MATa Δsst1 ade2-101 ochre trp1-Δ63 leu2-Δ1 ura3-52::GFP-TUB1::URA3kl his3-Δ200 lys2-801 ambre STU1-3mCherry::hphNT1 Δcen5::pGAL1-CEN3-LEU2 cdc20::HIS3MX6-pMET25-CDC20</i>                                                                                                                                                 | 3a                     |
| YCF2601     | <i>MATa Δsst1 ade2-101ochre trp1-Δ63 leu2-Δ1 ura3-52 his3-Δ200 lys2-801ambre STU1-3mCherry::natNT2 DAD1-yeGFP::kiTRP1 Δcen5::pGAL1-CEN3-LEU2 ADE1-pURA3-tetR-CFP3x::hphNT1 CEN5-tetO2x112::HIS3 cdc20::URA3kl-pMET25-CDC20</i>                                                                                                | 3b-g, 5a-e             |
| YME2761     | <i>MATa Δsst1 ade2-101ochre::pADH1-OsTIR1-9Myc::ADE2 trp1-Δ63 leu2-Δ1 ura3-52 his3-Δ200 lys2-801 ambre::stu1Δ(aa995-1180)-1mCherry::LYS2 DAD1-yeGFP::kiTRP1 STU1-IAA17::KANMX6 Δcen5::pGAL1-CEN3-LEU2 ADE1-pURA3-tetR-Cerulean5x::hphNT1 CEN5-tetO2x112-tetOx112::HIS3 cdc20::natNT2-pMET25-CDC20</i>                         | 4a-e                   |
| YME2719     | <i>MATa Δsst1 ade2-101 ochre trp1-Δ63 leu2-Δ1 ura3-52 his3-Δ200 lys2-801 ambre DAD1-yeGFP::kiTRP1 STU1-3mCherry::natNT2 Δcen5::pGAL1-CEN3-LEU2 ADE1-pURA3-tetR-CFP3x::hphNT1 CEN5-tetO2x112::HIS3 cdc20::URA3kl-pMET25-CDC20 Δslk19::KANMX6</i>                                                                               | 5a-d                   |
| YCF2613     | <i>MATa Δsst1 ade2-101ochre::pADH1-OsTIR1-9Myc::ADE2 trp1-Δ63::CFP-TUB1::kiTRP1 leu2-Δ1 ura3-52 his3-Δ200 lys2-801 ambre DAD1-yeGFP::hphNT1 STU1-IAA17::KANMX4 cdc20::natNT2-pMET25-CDC20</i>                                                                                                                                 | 5a-f                   |
| YME2689     | <i>MATa Δsst1 ade2-101ochre::pADH1-OsTIR1-9Myc::ADE2 trp1-Δ63 leu2-Δ1 ura3-52::GFP-TUB1::URA3-kl his3-Δ200 lys2-801 ambre STU1-IAA17::KANMX4 Δcen5::pGAL1-CEN3-LEU2 ADE1-pURA3-tetR-Cerulean5x::hphNT1 CEN5-tetO2x112-tetOx112::HIS3 cdc20::kiTRP1-pMET25-CDC20</i>                                                           | 6a, 8a-j               |
| YME2841     | <i>MATa Δsst1 ade2-101ochre trp1-Δ63 leu2-Δ1 ura3-52::GFP-TUB1::URA3kl his3-Δ200 lys2-801ambre STU1-3mCherry::natNT2 SLK19-ECFP-kanMX4 Δcen5::pGAL1-CEN3-LEU2</i>                                                                                                                                                             | 7a                     |



|         |                                                                                                                                                                                                                                                                                                                                                     |               |
|---------|-----------------------------------------------------------------------------------------------------------------------------------------------------------------------------------------------------------------------------------------------------------------------------------------------------------------------------------------------------|---------------|
| YCF2535 | <i>cdc20::HIS3MX6-pMET25-CDC20</i><br><i>MATa Δsst1 ade2-101 ochre trp1-Δ63 leu2-Δ1 ura3-52::GFP-TUB1::URA3kl his3-Δ200 lys2-801ambre STU1-3mCherry::natNT2 Δcen5::pGAL1-CEN3-LEU2 ADE1-pURA3-tetR-CFP3x::hphNT1 CEN5-tetO2x112::HIS3 cdc20::kITRP1-pMET25-CDC20</i>                                                                                | 7b            |
| YME2731 | <i>MATa Δsst1 ade2-101ochre::pADH1-OsTIR1-9Myc::ADE2 trp1-Δ63 leu2-Δ1 ura3-52::GFP-TUB1::URA3kl his3-Δ200 lys2-801ambre::pSTU1-STU1-3mCherry-pDAM1-dam1Δ(aa206-344)::LYS2 DAM1-IAA::KANMX4 STU1-IAA17::kITRP1 Δcen5::pGAL1-CEN3-LEU2 ADE1-pURA3-tetR-Cerulean5x::hphNT1 CEN5-tetO2x112-tetOx112::HIS3 cdc20::natNT2-pMET25-CDC20</i>                | 8k-l          |
| YME2726 | <i>MATa Δsst1 ade2-101ochre::pADH1-OsTIR1-9Myc::ADE2 trp1-Δ63 leu2-Δ1 ura3-52::GFP-TUB1::URA3kl his3-Δ200 lys2-801ambre::pDAM1-dam1Δ(aa206-344)::LYS2 DAM1-IAA17::kITRP1 Δcen5::pGAL1-CEN3-LEU2 ADE1-pURA3-tetR-Cerulean5x::hphNT1 CEN5-tetO2x112-tetOx112::HIS3 cdc20::natNT2-pMET25-CDC20</i>                                                     | 8k-l          |
| YME2782 | <i>MATa Δsst1 ade2-101 ochre::pADH1-OsTIR1-9Myc::ADE2 trp1-Δ63 leu2-Δ1 ura3-52::GFP-TUB1::URA3kl his3-Δ200 lys2-801ambre::pSTU1-STU1-3mCherry-pDAM1-dam1Δ(aa206-344)::LYS2 DAM1-IAA17::kanMX4 STU1-IAA17::kITRP1 Δcen5::pGAL1-CEN3-LEU2 ADE1-pURA3-tetR-Cerulean5x::hphNT1 CEN5-tetO2x112-tetOx112::HIS3 cdc20::natNT2-pMET25-CDC20 Δslk19::ble</i> | 8k-l          |
| YJO1464 | <i>MATa Δsst1 ade2-101ochre trp1-Δ63 leu2-Δ1 ura3-52 his3-Δ200 lys2-801ambre AME1-GFP::kanMX6 SPC72-ECFP::kITRP1 STU2-3mCherry::hphNT1</i>                                                                                                                                                                                                          | Supplement 1  |
| YJO1436 | <i>MATa Δsst1 ade2-101ochre trp1-Δ63 leu2-Δ1 ura3-52 his3-Δ200 lys2-801ambre AME1-GFP::kanMX6 SPC72-ECFP::kITRP1 BIM1-3mcherry::hphNT1</i>                                                                                                                                                                                                          | Supplement 1  |
| YJO1429 | <i>MATa Δsst1 ade2-101ochre trp1-Δ63 leu2-Δ1 ura3-52 his3-Δ200 lys2-801ambre AME1-GFP::kanMX6 SPC72-ECFP::kITRP1 BIK1-3mcherry::hphNT1</i>                                                                                                                                                                                                          | Supplement 1  |
| YJO1417 | <i>MATa Δsst1 ade2-101ochre trp1-Δ63 leu2-Δ1 ura3-52 his3-Δ200 lys2-801ambre AME1-GFP::kanMX6 SPC72-ECFP::kITRP1 KAR3-3mcherry::hphNT1</i>                                                                                                                                                                                                          | Supplement 1  |
| YJO1479 | <i>MATa Δsst1 ade2-101ochre trp1-Δ63 leu2-Δ1 ura3-52 his3-Δ200 lys2-801ambre AME1-GFP::kanMX6 SPC72-ECFP::kITRP1 CIN8-3mCherry::hphNT1</i>                                                                                                                                                                                                          | Supplement 1  |
| YJO1469 | <i>MATa Δsst1 ade2-101ochre trp1-Δ63 leu2-Δ1 ura3-52 his3-Δ200 lys2-801ambre AME1-GFP::kanMX6 SPC72-ECFP::kITRP1 FIN1-3mCherry::hphNT1</i>                                                                                                                                                                                                          | Supplement 1  |
| YJO1441 | <i>MATa Δsst1 ade2-101ochre trp1-Δ63 leu2-Δ1 ura3-52 his3-Δ200 lys2-801ambre AME1-GFP::kanMX6 SPC72-ECFP::kITRP1 KIP1-3mcherry::hphNT1</i>                                                                                                                                                                                                          | Supplement 1  |
| YJO1399 | <i>MATa Δsst1 ade2-101ochre trp1-Δ63 leu2-Δ1 ura3-52 his3-Δ200 lys2-801ambre ASE1-4GFP::kITRP1 SPC72-eCFP::kanMX4 STU1-3mcherry::hphNT1</i>                                                                                                                                                                                                         | Supplement 1  |
| YJO2708 | <i>MATa Δsst1 ade2-101ochre::pADH1-OsTIR1-9Myc::ADE2 trp1-Δ63 leu2-Δ1 ura3-52 his3-Δ200 lys2-801ambre NUF2-3mCherry::natNT2 SPC72-yeCFP::hphNT1 STU1-yeGFP::kITRP1 SPC105-IAA17-3HA::HIS3 cdc20::kanMX6-PGAL1-3HA-CDC20</i>                                                                                                                         | Supplement 3a |
| YJO2723 | <i>MATa Δsst1 ade2-101ochre::ADH1-OsTIR1-9Myc::ADE2 trp1-Δ63 leu2-Δ1 ura3-52 his3-Δ200 lys2-801ambre::P<sub>STU1</sub>-stu1Δ(aa570-716)-NLS-GFP::LYS2 NUF2-3mCherry::natNT2 SPC72-eCFP::hphNT1 STU1-IAA17::KanMX4 BUB3-IAA17::HIS3 cdc20::TRP1-pGAL1-3HA-CDC20</i>                                                                                  | Supplement 3b |
| YJO2727 | <i>MATa Δsst1 ade2-101ochre::P<sub>ADH1</sub>-OsTIR1-9Myc::ADE2 trp1-Δ63 leu2-Δ1 ura3-52 his3-Δ200 lys2-801ambre::P<sub>STU1</sub>-FLAG-stu1Δ(aa570-716)-NLS-GFP::LYS2 NUF2-3mCherry::natNT2 SPC72-eCFP::hphNT1 STU1-IAA17::KanMX4 Δmad1::loxP cdc20::HIS3MX6-pGAL1-3HA-CDC20</i>                                                                   | Supplement 3b |
| YJO2907 | <i>MATa Δsst1 ade2-101ochre trp1-Δ63 leu2-Δ1 ura3-52 his3-Δ200 lys2-801ambre MTW-3mCherry::hphNT1 STU1-yeGFP::kITRP1 SPC72-ECFP::kanMX4 Δmad3::HIS3MX6 cdc20::kIURA3-pGAL1-3HA-CDC20</i>                                                                                                                                                            | Supplement 3b |
| YJO1206 | <i>MATa Δsst1 ade2-101ochre trp1-Δ63 leu2-Δ1 ura3-52 his3-Δ200 lys2-801ambre STU1-9myc::kanMX6</i>                                                                                                                                                                                                                                                  | Supplement 4  |
| YJO2886 | <i>MATa Δsst1 ade2-101ochre trp1-Δ63 leu2-Δ1 ura3-52 his3-Δ200 lys2-801ambre STU1-9myc::kanMX6 SPC105-5FLAG::hphNT1</i>                                                                                                                                                                                                                             | Supplement 4  |
| YJO2948 | <i>MATa Δsst1 ade2-101ochre::pADH1-OsTIR1-9Myc::ADE2 trp1-Δ63 leu2-Δ1:pSPC105-spc105-6A(T149A, T172A, T211A, T235A, T284A, T313A)-5FLAG-LEU2 ura3-52 his3-Δ200 lys2-801ambre NUF2-3mcherry::natNT2 SPB72-yeCFP::hphT1 STU1-9myc::kITRP1 SPC105-IAA17-3HA::HIS3</i>                                                                                  | Supplement 4  |
| YME2441 | <i>MATa Δsst ade2-101ochre trp1-Δ63 leu2-Δ1 ura3-52 his3-Δ200 lys2-801ambre STU1-3mCherry::hphNT1 SPC72-ECFP::kanMX4 NUF2-yeGFP::HIS3MX6</i>                                                                                                                                                                                                        | Supplement 5  |

## Supplementary Table 2 Plasmids used in this study

| Plasmid name | Description                                                                         |
|--------------|-------------------------------------------------------------------------------------|
| pVS1499      | <i>pSTU1-FLAG-stu1Δ(aa570-716)-NLS-GFP in YDpK, ampR</i>                            |
| pJO1598      | <i>pSTU1-FLAG-stu1Δ(aa1-260, 997-1514)-NLS-GFP in YDpK, ampR</i>                    |
| pJO1599      | <i>pSTU1-FLAG-stu1Δ(aa1-260, 1182-1514)-NLS-GFP in YDpK, ampR</i>                   |
| pME1546      | <i>pSPC105-spc105-6A (T149A, T172A, T211A, T235A, T284A, T313A) in pRS305, ampR</i> |
| pME1597      | <i>pSTU1-stu1Δ(aa995-1180)-1mCherry in YDp-K, ampR</i>                              |
| pCF1563      | <i>pDAM1-dam1Δ(aa206-344) in YDp-K, ampR</i>                                        |
| pME1561      | <i>pSTU1-STU1-3mCherry-pDAM1-dam1Δ(aa206-344) in YDp-K, ampR</i>                    |
| pME1595      | <i>IAA17::kITRP1, ampR</i>                                                          |
| pVS1453      | <i>pADH1-OsTIR1-9Myc::ADE2, ampR</i>                                                |
| pMK1459      | <i>Δcen5::pGAL1-CEN3::LEU2, ampR</i>                                                |
| pME1590      | <i>ADE1-pURA-tetR-Cerulean5x::hphNT1, ampR</i>                                      |

**Supplementary Table 3** Statistics source data

|                                           |                                               |                |            |                                   |
|-------------------------------------------|-----------------------------------------------|----------------|------------|-----------------------------------|
| Fig. 1b                                   | Stu1 sequestered at uaKT                      | Observed Cells | % of cells | Statistics                        |
| <i>WT</i>                                 |                                               | 99             | 100        | 99                                |
| Fig. 1c                                   | Slk19 sequestered at uaKT                     | Observed Cells | % of cells | Statistics                        |
| <i>WT</i>                                 |                                               | 87             | 87         | 100                               |
| Fig. 1d                                   | Slk19 not sequestered but localized at uaKT   | Observed Cells | % of cells | Statistics <sup>1</sup><br>Fisher |
| <i>Δstu1'</i>                             |                                               | 91             | 97         | 94<br>p < 0.0001                  |
| Fig. 1e                                   | Stu1 not sequestered but localized at uaKT    | Observed Cells | % of cells | Statistics <sup>1</sup><br>Fisher |
| <i>Δslk19</i>                             |                                               | 75             | 85         | 88<br>p < 0.0001                  |
| Fig. 1f                                   | Stu1ΔCL not sequestered but localized at uaKT | Observed Cells | % of cells | Statistics <sup>1</sup><br>Fisher |
| <i>stu1ΔCL</i>                            |                                               | 73             | 85         | 86<br>p < 0.0001                  |
| Fig. 1g                                   | Slk19 not sequestered but localized at uaKT   | Observed Cells | % of cells | Statistics <sup>1</sup><br>Fisher |
| <i>stu1ΔCL</i>                            |                                               | 89             | 89         | 100<br>p < 0.0001                 |
| Fig. 1h                                   | Stu1ΔTOGL1ΔD4 localized at uaKT               | Observed Cells | % of cells | Statistics                        |
| <i>stu1ΔTOGL1ΔD4</i>                      |                                               | 87             | 100        | 87                                |
| Fig. 1i                                   | Stu1ΔTOGL1ΔCLΔD4 not localized at uaKT        | Observed Cells | % of cells | Statistics <sup>2</sup><br>Fisher |
| <i>stu1ΔTOGL1-ΔCLΔD4</i>                  |                                               | 103            | 134        | 77<br>p < 0.0001                  |
| Fig. 1j                                   | Stu1 not localized at uaKT                    | Observed Cells | % of cells | Statistics <sup>1</sup><br>Fisher |
| <i>mps1-as1</i>                           |                                               | 97             | 100        | 97<br>p < 0.0001                  |
| Fig. 1k                                   | Slk19 not sequestered but localized at uaKT   | Observed Cells | % of cells | Statistics <sup>1</sup><br>Fisher |
| <i>mps1-as1</i>                           |                                               | 103            | 108        | 95<br>p < 0.0001                  |
| Fig. 1l                                   | Stu1 not localized at uaKT                    | Observed Cells | % of cells | Statistics <sup>1</sup><br>Fisher |
| <i>spc105-6A</i>                          |                                               | 171            | 219        | 78<br>p < 0.0001                  |
| Fig. 1m                                   | Stu1 sequestered at attached KT               | Observed Cells | % of cells | Statistics <sup>3</sup><br>Fisher |
| - Rapamycin                               |                                               | 2              | 95         | 2                                 |
| + Rapamycin                               |                                               | 93             | 109        | 85<br>p < 0.0001                  |
| Fig. 2a-c. Intensity of Stu1 localization |                                               | Observed Cells |            |                                   |
| <i>WT</i>                                 |                                               | 33             |            |                                   |
| <i>stu1ΔCL</i>                            |                                               | 22             |            |                                   |
| <i>Δslk19</i>                             |                                               | 29             |            |                                   |
| <i>Δmps1'</i>                             |                                               | 20             |            |                                   |

|                                    |                   |                        |                                         |
|------------------------------------|-------------------|------------------------|-----------------------------------------|
| Fig. 3d,e, MT length ( <i>WT</i> ) | Observed<br>Cells | Observed<br>Timepoints | Statistics <sup>4</sup><br>Mann-Whitney |
| No uaKT                            | 87                | 1275                   | p < 0.0001                              |
| uaKT                               | 60                | 545                    |                                         |

|                                  |                   |                        |                                       |
|----------------------------------|-------------------|------------------------|---------------------------------------|
| Fig. 3f. MT number ( <i>WT</i> ) | Observed<br>Cells | Observed<br>Timepoints | Statistics <sup>4</sup><br>Chi-square |
| No uaKT                          | 87                | 1275                   | p < 0.0001                            |
| uaKT                             | 60                | 545                    |                                       |

|                                               |                   |                        |                                                    |
|-----------------------------------------------|-------------------|------------------------|----------------------------------------------------|
| Fig. 3g. MT length distribution ( <i>WT</i> ) | Observed<br>Cells | Observed<br>Timepoints | Statistics <sup>4</sup><br>Chi-square <sup>7</sup> |
| No uaKT                                       | 87                | 1275                   | p < 0.0001                                         |
| uaKT                                          | 60                | 545                    |                                                    |

|                                   |                   |                        |                            |
|-----------------------------------|-------------------|------------------------|----------------------------|
| Fig. 4b,c MT length               | Observed<br>Cells | Observed<br>Timepoints | Statistics<br>Mann-Whitney |
| <i>stu1</i> Δ <i>CL</i> with uaKT | 58                | 827                    | p < 0.0001 <sup>5</sup>    |
| ,Δ <i>mps1</i> ' with uaKT        | 87                | 1174                   | p < 0.0001 <sup>5</sup>    |
| ,Δ <i>mps1</i> ' without uaKT     | 82                | 1231                   | p = 0.3789 <sup>6</sup>    |

|                                   |                   |                        |                                       |
|-----------------------------------|-------------------|------------------------|---------------------------------------|
| Fig. 4d. MT number                | Observed<br>Cells | Observed<br>Timepoints | Statistics <sup>5</sup><br>Chi-square |
| <i>stu1</i> Δ <i>CL</i> with uaKT | 58                | 827                    | p < 0.0001                            |
| ,Δ <i>mps1</i> ' with uaKT        | 87                | 1174                   | p < 0.0001                            |

|                                   |                   |                        |                                                    |
|-----------------------------------|-------------------|------------------------|----------------------------------------------------|
| Fig. 4e. MT length distribution   | Observed<br>Cells | Observed<br>Timepoints | Statistics <sup>5</sup><br>Chi-square <sup>7</sup> |
| <i>stu1</i> Δ <i>CL</i> with uaKT | 58                | 827                    | p < 0.0001                                         |
| ,Δ <i>mps1</i> ' with uaKT        | 87                | 1174                   | p < 0.0001                                         |

|                     |                   |                        |                                         |
|---------------------|-------------------|------------------------|-----------------------------------------|
| Fig. 5b. MT length  | Observed<br>Cells | Observed<br>Timepoints | Statistics <sup>1</sup><br>Mann-Whitney |
| <i>WT</i> (no uaKT) | 202               | 202                    | p < 0.0001                              |
| ,Δ <i>stu1</i> '    | 208               | 208                    |                                         |
| Δ <i>slk19</i>      | 178               | 178                    |                                         |

|                     |                   |                        |                                       |
|---------------------|-------------------|------------------------|---------------------------------------|
| Fig. 5c. MT number  | Observed<br>Cells | Observed<br>Timepoints | Statistics <sup>1</sup><br>Chi-square |
| <i>WT</i> (no uaKT) | 202               | 202                    | p < 0.0001                            |
| ,Δ <i>stu1</i> '    | 208               | 208                    |                                       |
| Δ <i>slk19</i>      | 178               | 178                    |                                       |

|                                 |                   |                        |                                                    |
|---------------------------------|-------------------|------------------------|----------------------------------------------------|
| Fig. 5d. MT length distribution | Observed<br>Cells | Observed<br>Timepoints | Statistics <sup>1</sup><br>Chi-square <sup>7</sup> |
| <i>WT</i> (no uaKT)             | 202               | 202                    | p < 0.0001                                         |
| ,Δ <i>stu1</i> '                | 208               | 208                    |                                                    |
| Δ <i>slk19</i>                  | 178               | 178                    |                                                    |

|                         |                   |                 |                                         |
|-------------------------|-------------------|-----------------|-----------------------------------------|
| Fig. 5e. MT growth rate | Observed<br>Cells | Observed<br>MTs | Statistics <sup>5</sup><br>Mann-Whitney |
| <i>WT</i> with uaKT     | 54                | 46              | p = 0.003                               |
| ,Δ <i>stu1</i> '        | 27                | 41              |                                         |

|                            |                   |                 |                                         |
|----------------------------|-------------------|-----------------|-----------------------------------------|
| Fig. 5e. MT shrinkage rate | Observed<br>Cells | Observed<br>MTs | Statistics <sup>5</sup><br>Mann-Whitney |
| <i>WT</i> with uaKT        | 54                | 46              | p = 0.017                               |
| ,Δ <i>stu1</i> '           | 27                | 41              |                                         |

| Fig. 5e. MT rescue frequency | Observed Cells | Observed MTs | Observed Events |
|------------------------------|----------------|--------------|-----------------|
| <i>WT with uaKT</i>          | 54             | 46           | 11              |
| <i>,Δstu1'</i>               | 27             | 41           | 4               |

| Fig. 5e. MT catastrophe frequency | Observed Cells | Observed MTs | Observed Events |
|-----------------------------------|----------------|--------------|-----------------|
| <i>WT with uaKT</i>               | 54             | 46           | 53              |
| <i>,Δstu1'</i>                    | 27             | 41           | 44              |

| Fig. 5e. MT without rescue event | Observed Cells | Observed MTs | Statistics <sup>5</sup><br>Fisher |
|----------------------------------|----------------|--------------|-----------------------------------|
| <i>WT with uaKT</i>              | 54             | 46           |                                   |
| <i>,Δstu1'</i>                   | 27             | 41           | p = 0.044                         |

| Fig. 6a. Capturing efficiency | Observed Cells |
|-------------------------------|----------------|
| <i>WT</i>                     | 86             |
| <i>Δslk19</i>                 | 66             |
| <i>,Δstu1'</i>                | 67             |
| <i>stu1ΔCL</i>                | 79             |
| <i>stu1ΔCL + STU1</i>         | 81             |
| <i>,Δmps1'</i>                | 104            |

| Fig. 7a Slk19 and Stu1 colocalization after capturing | Observed capturing events | Observed timepoints |
|-------------------------------------------------------|---------------------------|---------------------|
|                                                       | 12                        | 23                  |

| Fig. 7c Stu1 localization after capturing | Observed capturing events |
|-------------------------------------------|---------------------------|
|                                           | 86                        |

| Fig. 7c Stu1 localization after capturing | S.D. of 2 experiments |
|-------------------------------------------|-----------------------|
| Stu1 behind + overtakes KT                | 1.72                  |
| Stu1 behind + does not overtake KT        | 6.47                  |
| Stu1 Co-transport +overtakes KT           | 4.17                  |
| Stu1 Co-transport does not overtake KT    | 1.72                  |
| Stu1 precedes                             | 2.29                  |

| Fig. 8a, Outcome of MT interaction | Observed Cells | Observed Capt. Events | Statistics <sup>1</sup><br>Fisher |
|------------------------------------|----------------|-----------------------|-----------------------------------|
| <i>WT</i>                          | 127            | 120                   |                                   |
| <i>Δslk19</i>                      | 124            | 128                   | p = 0.0025                        |
| <i>,Δstu1'</i>                     | 127            | 147                   | p < 0.0001                        |

| Fig. 8d, Rescue after lateral attachment | Observed Cells | Observed Capt. Events | Statistics <sup>1</sup><br>Fisher |
|------------------------------------------|----------------|-----------------------|-----------------------------------|
| <i>WT</i>                                | 127            | 138                   |                                   |
| <i>Δslk19</i>                            | 124            | 138                   | p = 0.0027                        |
| <i>,Δstu1'</i>                           | 127            | 171                   | p = 0.0027                        |

| Fig. 8g, Rescue when the MT plus-end reaches the KT | Observed Cells | Observed Capt. Events | Statistics <sup>1</sup><br>Fisher |
|-----------------------------------------------------|----------------|-----------------------|-----------------------------------|
| <i>WT</i>                                           | 127            | 74                    |                                   |
| <i>Δslk19</i>                                       | 124            | 98                    | p = 0.15                          |
| <i>,Δstu1'</i>                                      | 127            | 132                   | p = 0.069                         |

| Fig. 8i, MT plus-end reaches KT distant to the SPB | Observed Cells | Observed Capt. Events | Statistics <sup>1</sup> Fisher |
|----------------------------------------------------|----------------|-----------------------|--------------------------------|
| <i>WT</i>                                          | 127            | 127                   |                                |
| <i>Δslk19</i>                                      | 124            | 135                   | p = 0.0068                     |
| <i>Δstu1'</i>                                      | 127            | 165                   | p < 0.0001                     |

| Fig. 8j, Start of end-on pulling | Observed Cells | Observed Capt. Events | Statistics <sup>1</sup> Fisher |
|----------------------------------|----------------|-----------------------|--------------------------------|
| <i>WT</i>                        | 127            | 28                    |                                |
| <i>Δslk19</i>                    | 124            | 48                    | p = 0.0097                     |
| <i>Δstu1'</i>                    | 127            | 52                    | p < 0.0001                     |

| Fig. 8k, End-on standstill | Observed Cells | Observed Capt. Events | Statistics <sup>1</sup> Fisher |
|----------------------------|----------------|-----------------------|--------------------------------|
| <i>WT</i>                  | 92             | 101                   |                                |
| <i>Δslk19</i>              | 136            | 153                   | p < 0.0001                     |
| <i>Δstu1'</i>              | 95             | 102                   | p < 0.0001                     |

| Supp. Fig. 2  | Observed Cells | Statistics <sup>1</sup> Chi-square |
|---------------|----------------|------------------------------------|
| <i>WT</i>     | 119            |                                    |
| <i>Δstu1'</i> | 125            | p < 0.0001                         |

| Supp. Fig. 3a   | Stu1 not sequestered at uaKT | Observed Cells | % of cells | Statistics <sup>1</sup> Fisher |
|-----------------|------------------------------|----------------|------------|--------------------------------|
| <i>Δspc105'</i> | 112                          | 129            | 87         | p < 0.0001                     |

| Supp. Fig. 3b | Stu1ΔML sequestered at uaKT | Observed Cells | % of cells | Statistics <sup>8</sup> Fisher |
|---------------|-----------------------------|----------------|------------|--------------------------------|
| <i>Δbub3'</i> | 113                         | 139            | 81         | p < 0.0001                     |
| <i>Δmad1</i>  | 90                          | 107            | 84         | p < 0.0001                     |

| Supp. Fig. 3b | Stu1 sequestered at uaKT | Observed Cells | % of cells | Statistics <sup>8</sup> Fisher |
|---------------|--------------------------|----------------|------------|--------------------------------|
| <i>Δmad3'</i> | 103                      | 104            | 99         | p < 0.0001                     |

| Supp. Fig. 5 | Observed cells |
|--------------|----------------|
| Experiment 1 | 153            |
| Experiment 2 | 155            |
| Experiment 3 | 130            |

| Supp. Fig. 5       | Average % of cells (3 experiments) | S.D. of 3 experiments |
|--------------------|------------------------------------|-----------------------|
| SPB-distal, ≥50%   | 6.12                               | 0.86                  |
| SPB-distal, <50%   | 8.44                               | 1.76                  |
| SPB-proximal, ≥50% | 11.79                              | 3.33                  |
| Not detected       | 73.65                              | 0.71                  |

<sup>1</sup>Compared to *WT*

<sup>2</sup>Compared to *stu1ΔTOGL1ΔD4*

<sup>3</sup>Compared to '- Rapamycin'

<sup>4</sup>Compared to *WT* (no uaKT)

<sup>5</sup>Compared to *WT* with uaKT

<sup>6</sup>Compared to *Δmps1'* with uaKT

<sup>7</sup>The MT length groups 0, 0-1, 1-2, 2-3 and >3 μm where used for the test

<sup>8</sup>Compared to *Δslk19'*
